# Supplementary material for: Coupling novel Li7TaO6 surface buffering with bulk Ta-doping to achieve long-life sulfide-based all-solid-state lithium batteries
Source: Royal Society of Chemistry journal article supplement (doi:10.1039/d2ta06703j), 2022-01-01
Supplement: d2ta06703j1.pdf [file d2ta06703j1.pdf]

## Electronic Supplementary Information

### **Coupling Novel $\text{Li}_7\text{TaO}_6$ Surface Buffering with Bulk Ta-Doping to Achieve Long-Life Sulfide-Based All-Solid-State Lithium Batteries**

Jie Shi<sup>a</sup>, Zihui Ma<sup>a</sup>, Kun Han<sup>a</sup>, Qi Wan<sup>b</sup>, Di Wu<sup>a</sup>, Xuanhui Qu<sup>a</sup>, Ping Li<sup>a\*</sup>

<sup>a</sup> Beijing Advanced Innovation Center for Materials Genome Engineering, Institute for Advanced Materials and Technology, University of Science and Technology Beijing, Beijing 100083, PR China.

<sup>b</sup> School of Materials and Chemistry, Southwest University of Science and Technology, Mianyang, Sichuan 621010, PR China.

\* Corresponding author.

E-mail address: ustbliping@126.com.

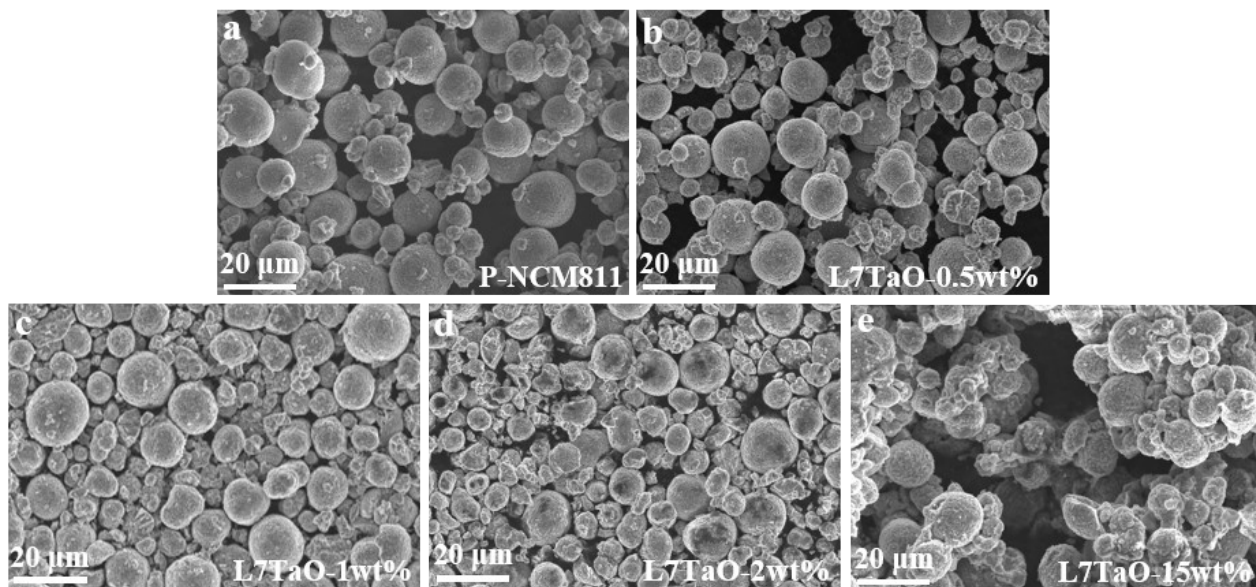

**Fig. S1.** SEM images of (a) P-NCM811, (b) L7TaO-0.5 wt%, (c) L7TaO-1 wt%, (d) L7TaO-2 wt% and (e) L7TaO-15 wt%.

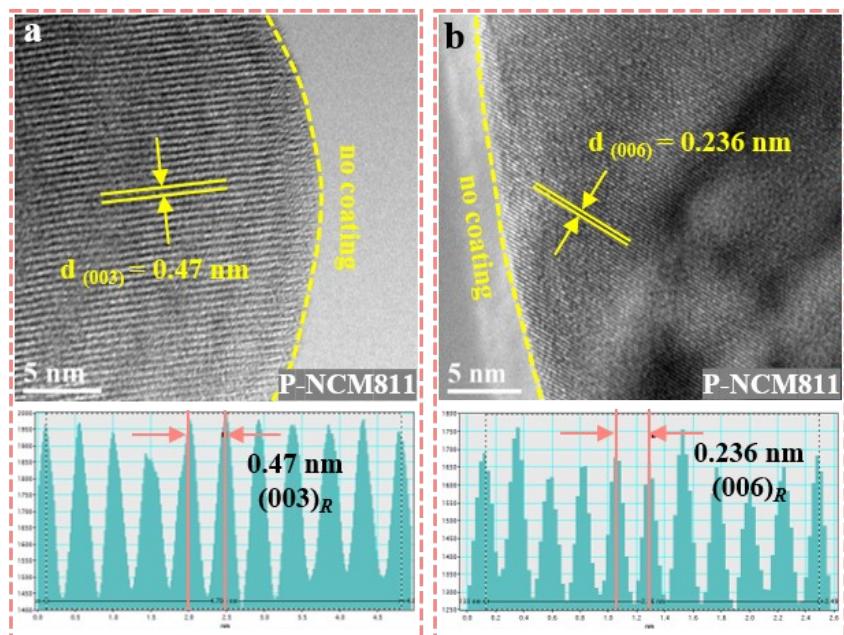

**Fig. S2.** HRTEM images of (a, b) P-NCM811 at different regions.

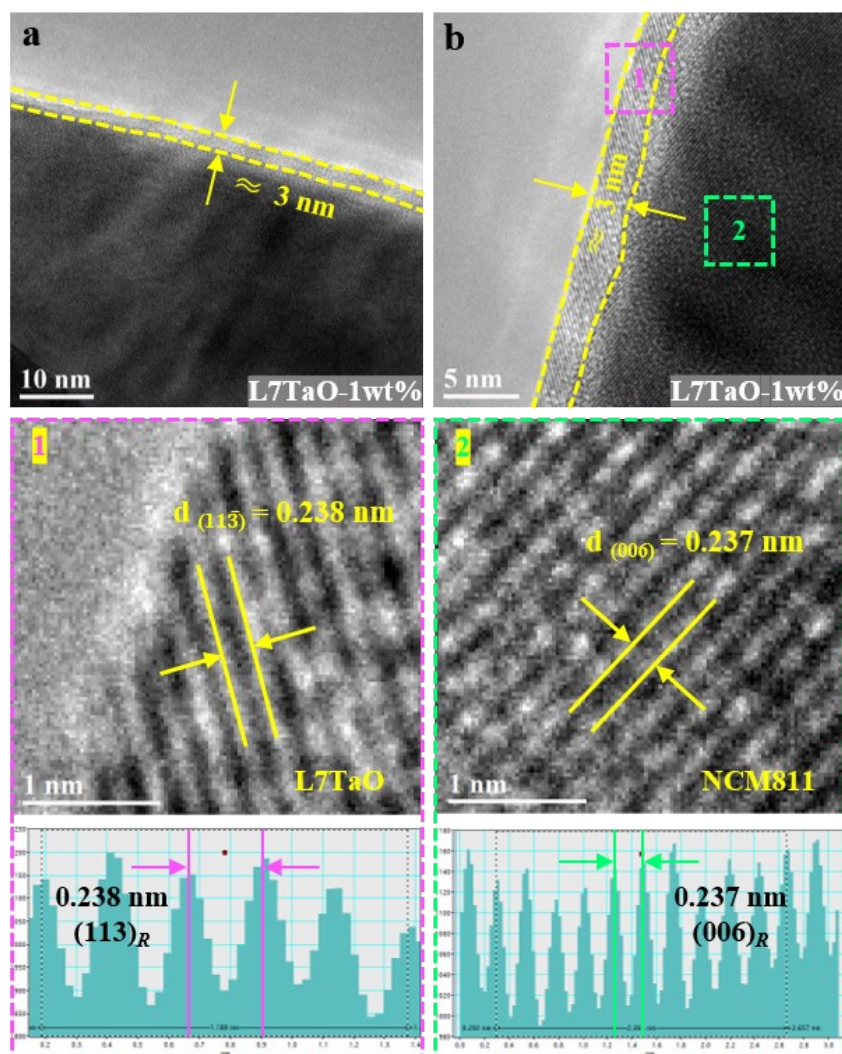

**Fig. S3.** HRTEM images of (a, b) L7TaO-1 wt% at different regions (Images of 1 and 2 correspond to the position 1,2 of (b)). The distance of the two yellow dotted lines represents the thickness of the buffering layer.

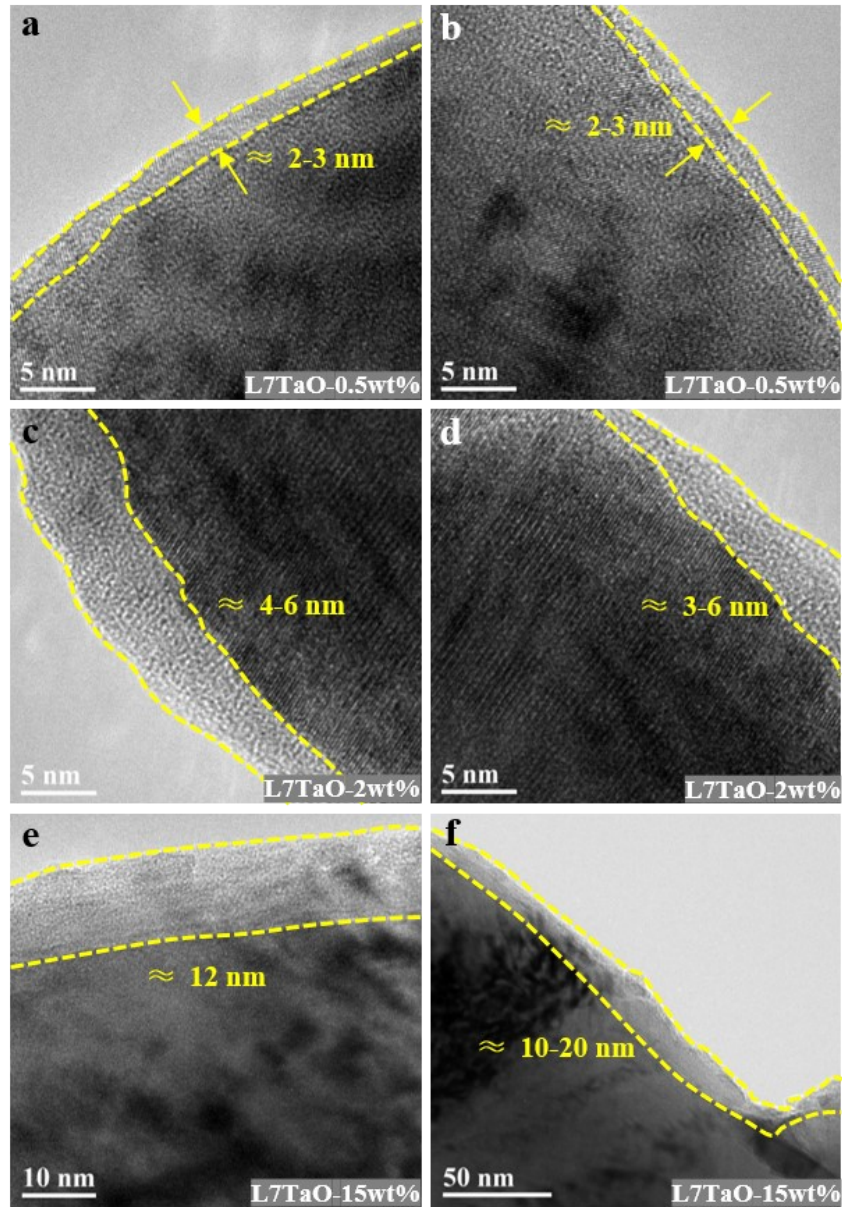

**Fig. S4.** HRTEM images of (a, b) L7TaO-0.5 wt%, (c, d) L7TaO-2 wt% and (e, f) L7TaO-15 wt% at different regions. The distance of the two yellow dotted lines represents the thickness of the buffering layer.

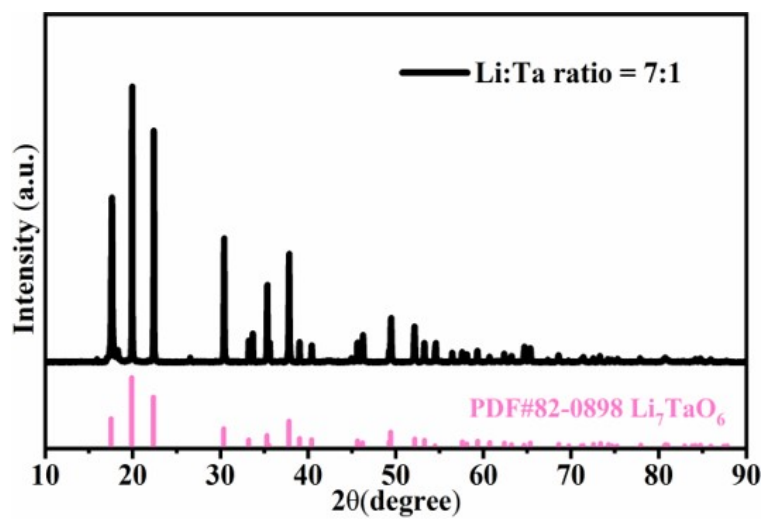

Fig. S5. The XRD patterns of obtained  $\text{Li}_7\text{TaO}_6$ .



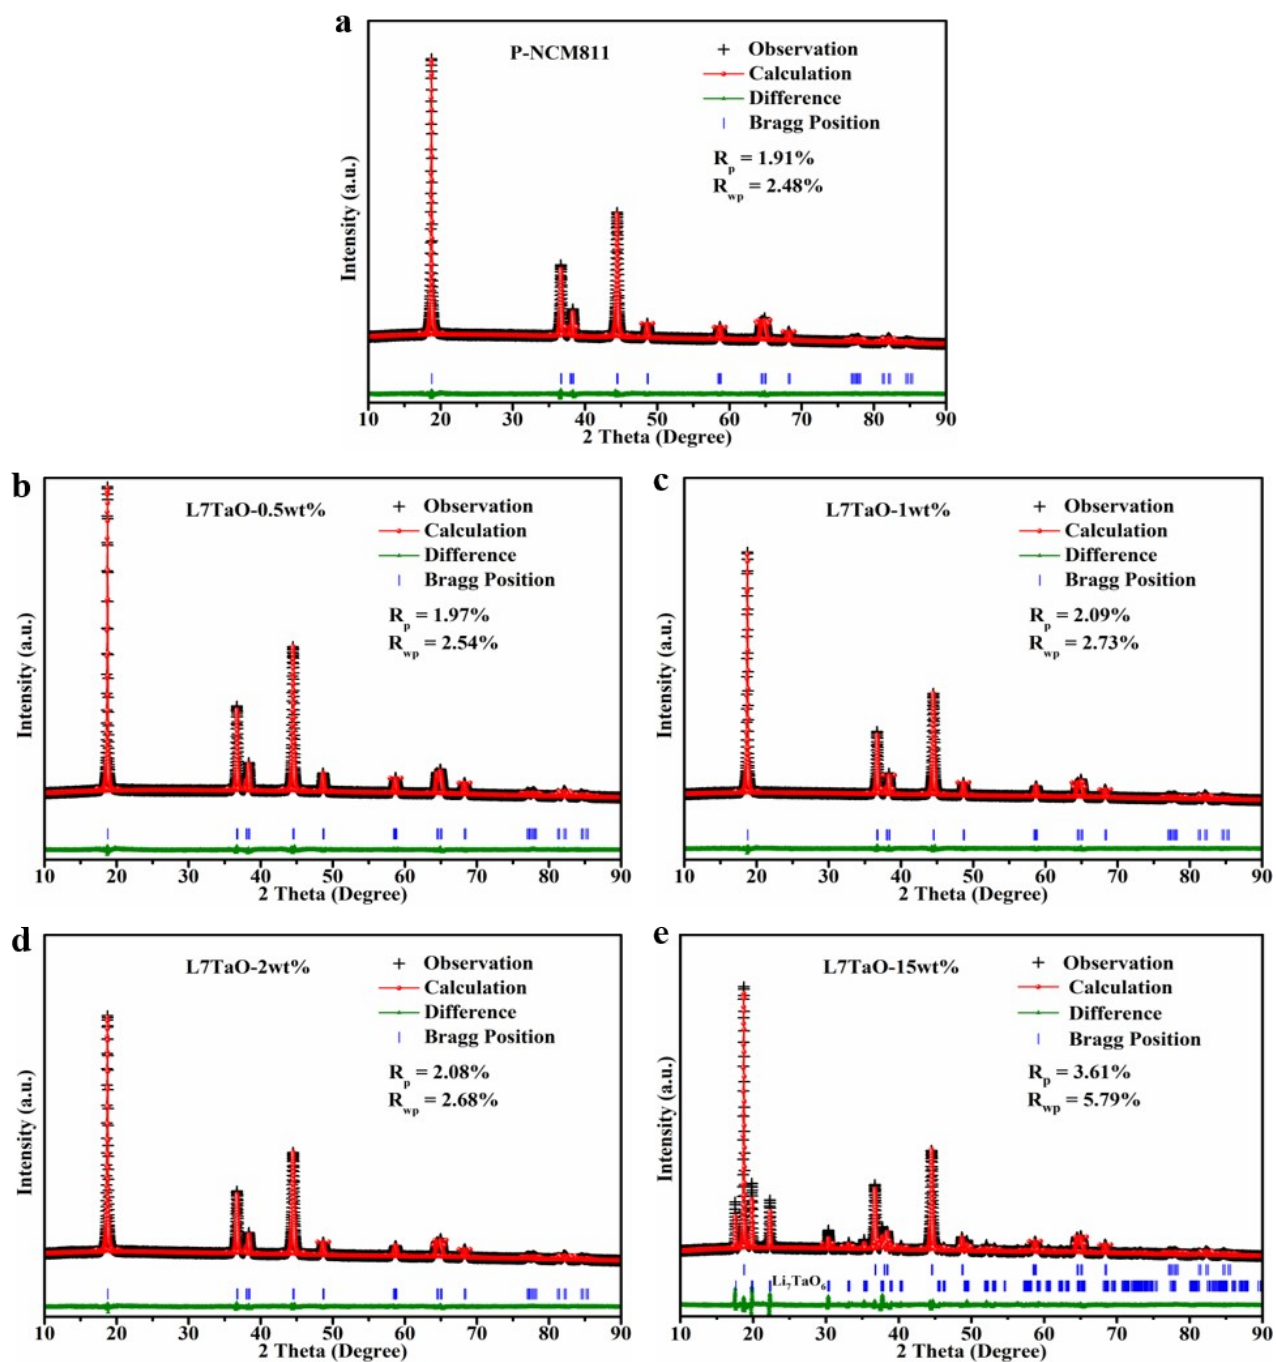

**Fig. S6.** XRD patterns and Rietveld analysis of (a) P-NCM811, (b) L7TaO-0.5 wt%, (c) L7TaO-1 wt%, (d) L7TaO-2 wt% and (e) L7TaO-15 wt% materials.

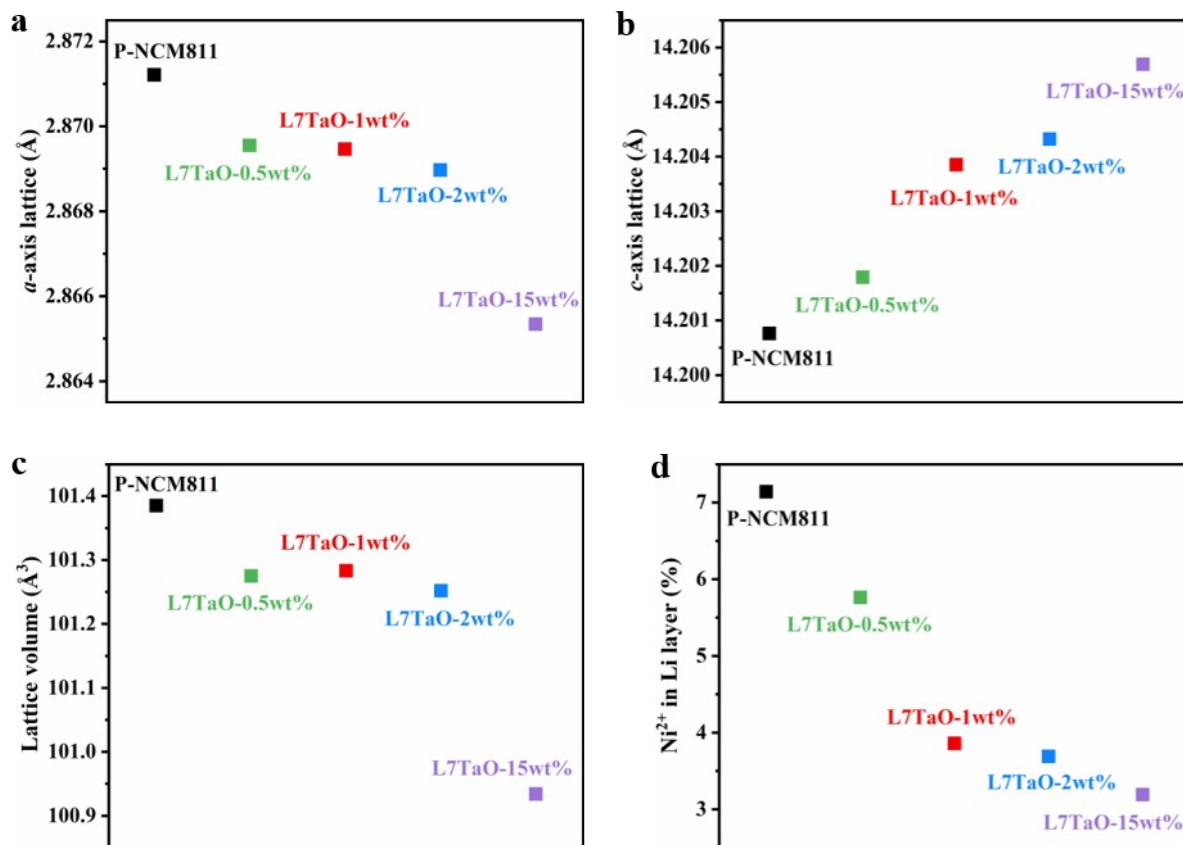

**Fig. S7.** The evolutions of XRD Rietveld refinement data for P-NCM811 and L7TaO-Q wt% (Q = 0.5, 1, 2 and 15) materials: (a) lattice parameters  $a$ , (b) lattice parameters  $c$ , (c) lattice parameters  $V$  and (d) the  $\text{Li}^+/\text{Ni}^{2+}$  mixing degree.



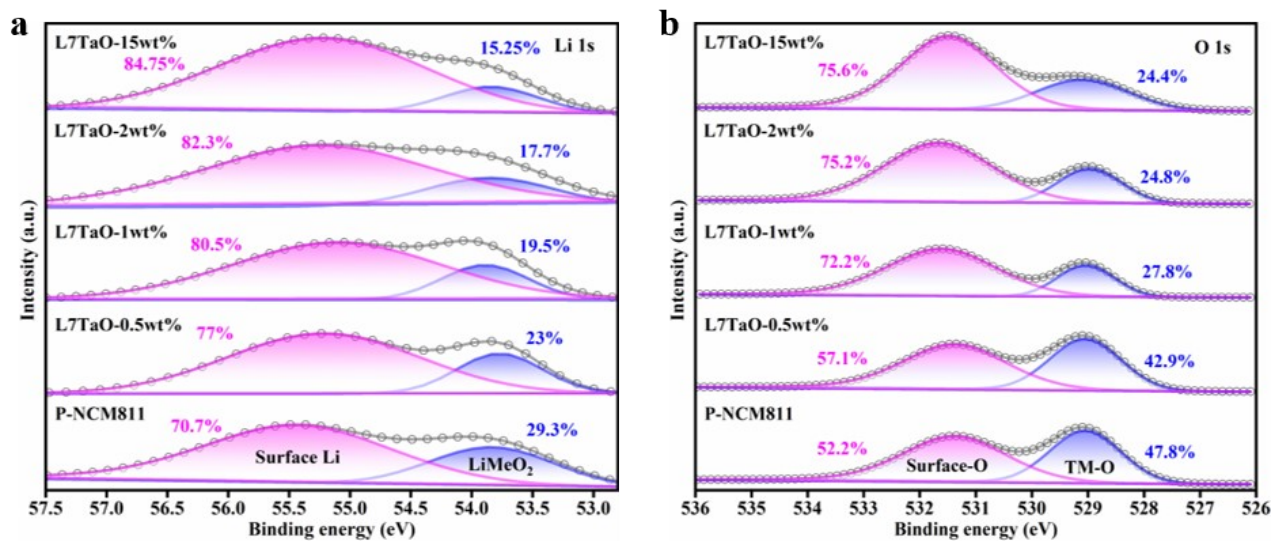

**Fig. S8.** (a) Li 1s and (b) O 1s XPS spectra of P-NCM811 and L7TaO-Q wt% (Q = 0.5, 1, 2 and 15) materials.

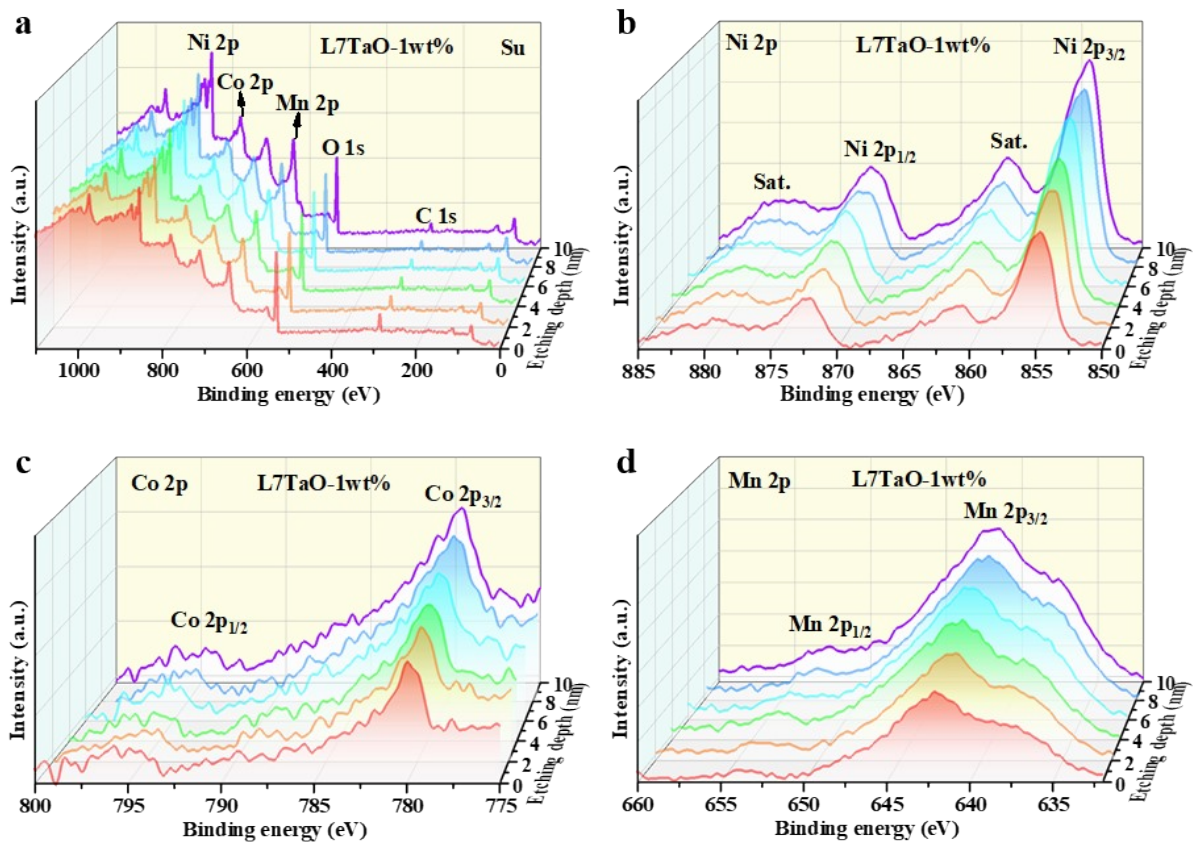

**Fig. S9.** XPS spectra evolution of (a) summary spectra, (b) Ni 2p, (c) Co 2p and (d) Mn 2p versus etching depth.

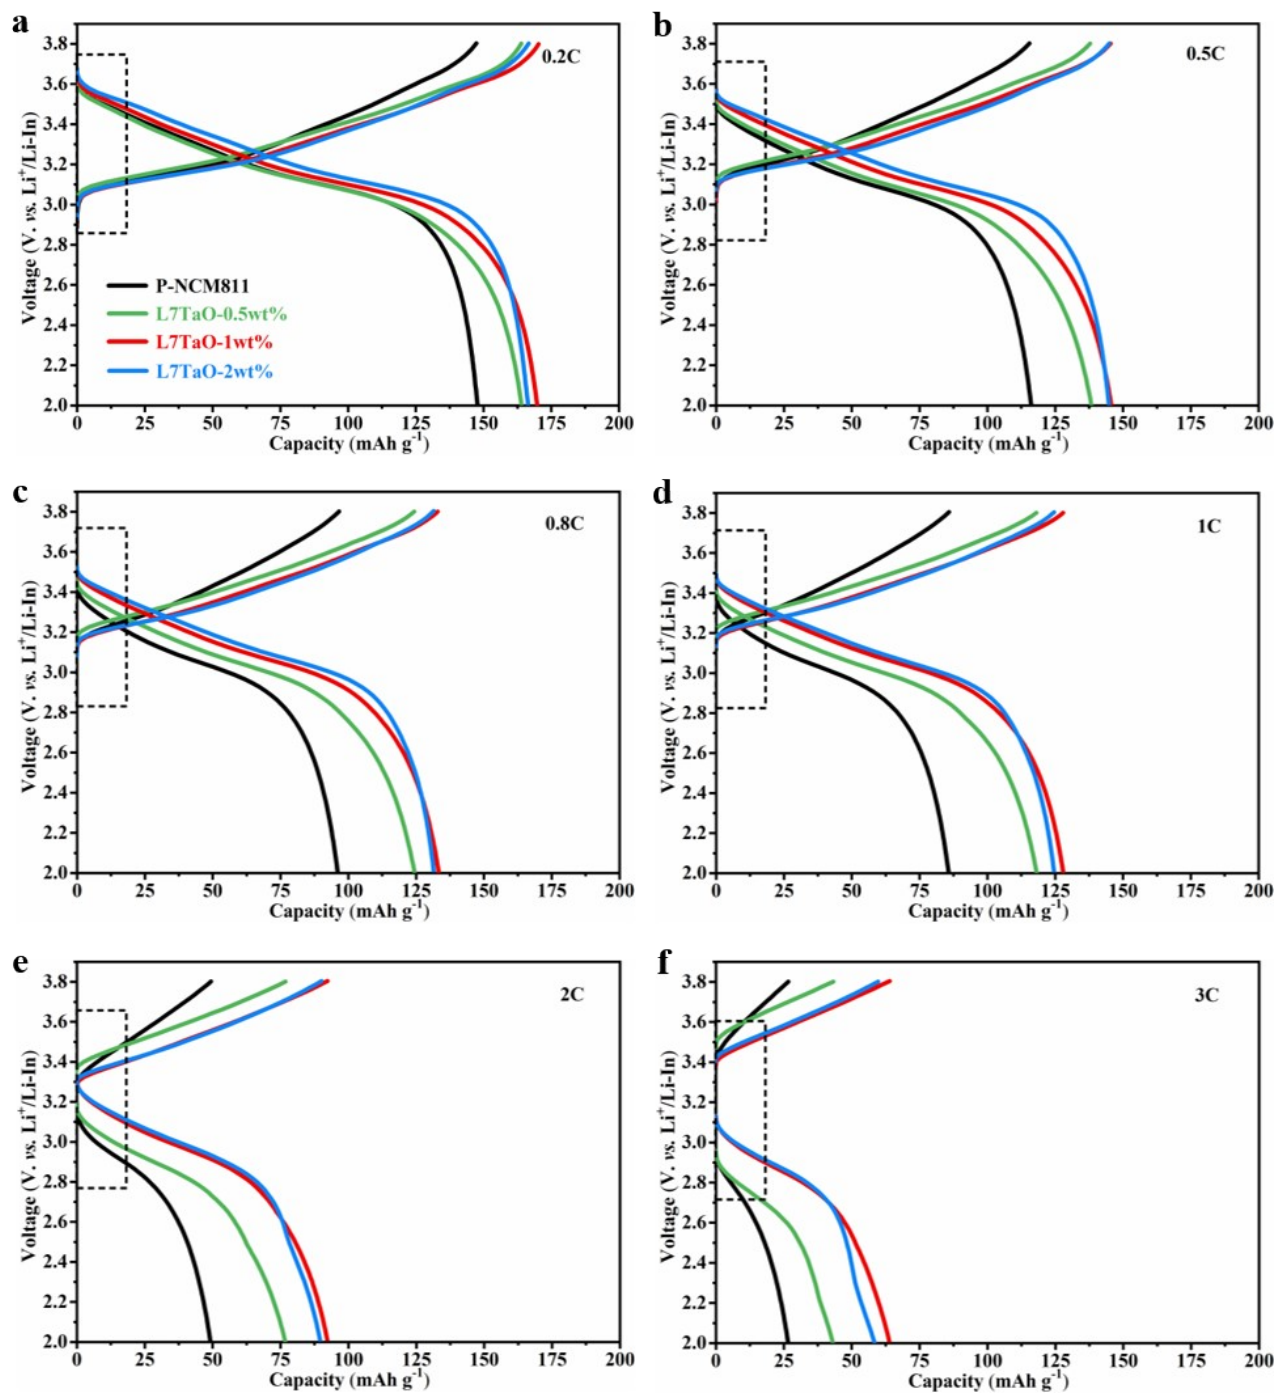

**Fig. S10.** Comparison of charge-discharge curves of the P-NCM811 and L7TaO-Q wt% ( $Q = 0.5, 1$  and  $2$ ) at different current densities ( $1C = 170 \text{ mA g}^{-1}$ ), which clearly show the electrode polarization trends. (a)  $0.2C$ , (b)  $0.5C$ , (c)  $0.8C$ , (d)  $1C$ , (e)  $2C$  and (f)  $3C$ .

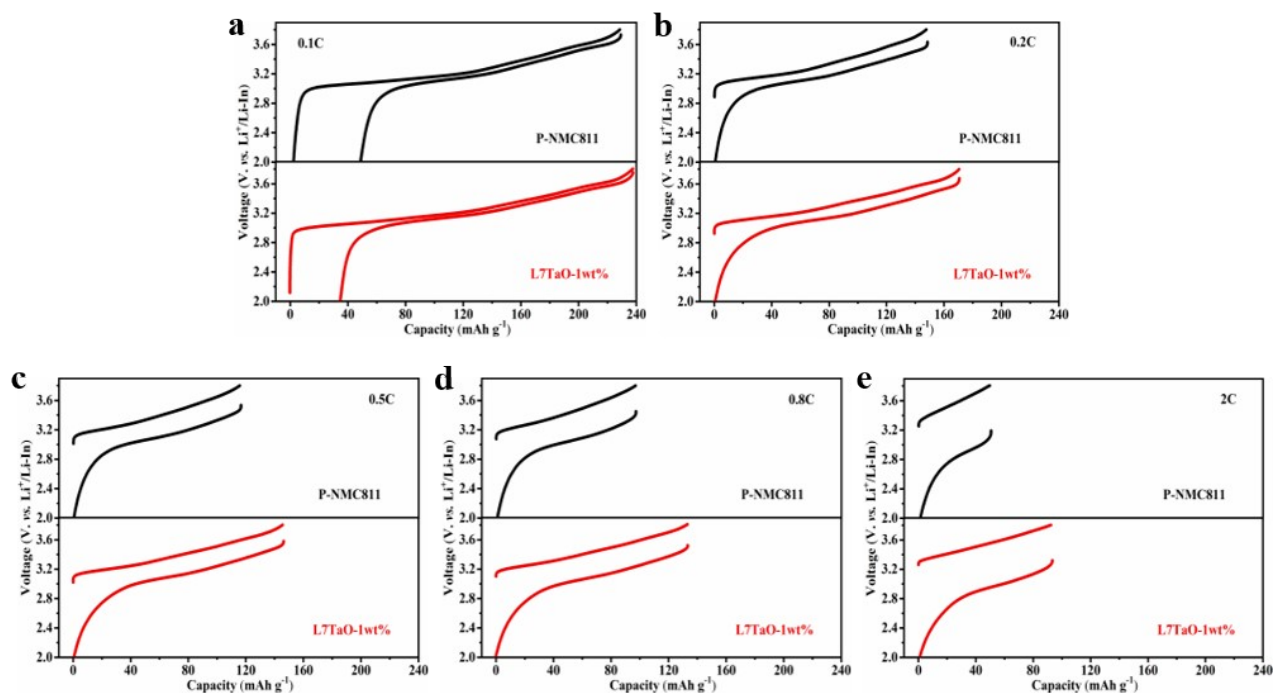

**Fig. S11.** Comparison of charge-discharge curves of the P-NCM811 and L7TaO-1 wt% at different current densities: (a) 0.1C, (b) 0.2C, (c) 0.5C, (d) 0.8C and (e) 2C. (1C = 170 mA g<sup>-1</sup>)

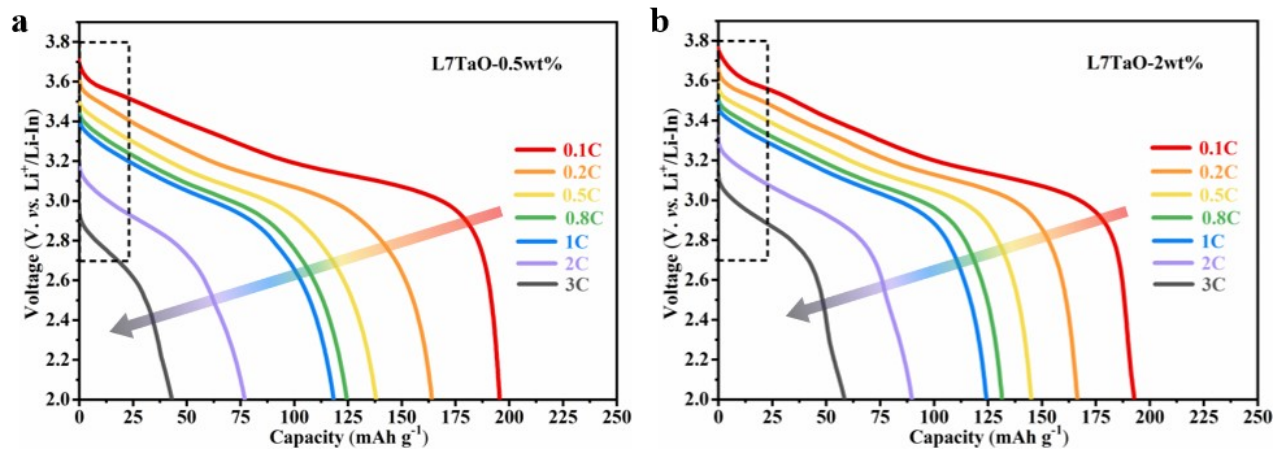

**Fig. S12.** The discharge curves of (a) L7TaO-0.5 wt% and (b) L7TaO-2 wt% under various current densities. ( $1\text{C} = 170 \text{ mA g}^{-1}$ )

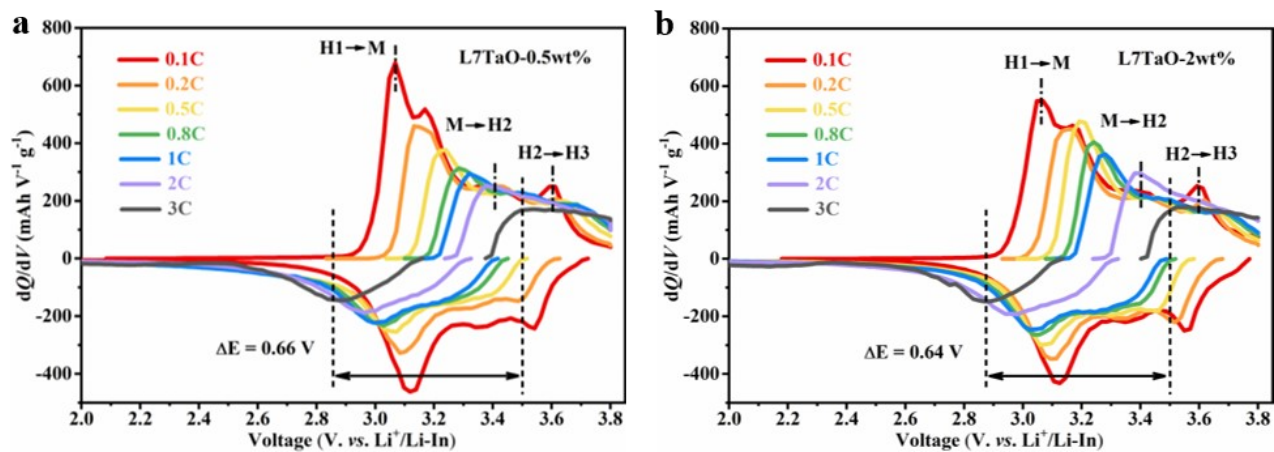

**Fig. S13.** The  $dQ/dV$  curves of (a) L7TaO-0.5 wt% and (b) L7TaO-2 wt% at different C-rates. (1C =  $170 \text{ mA g}^{-1}$ )



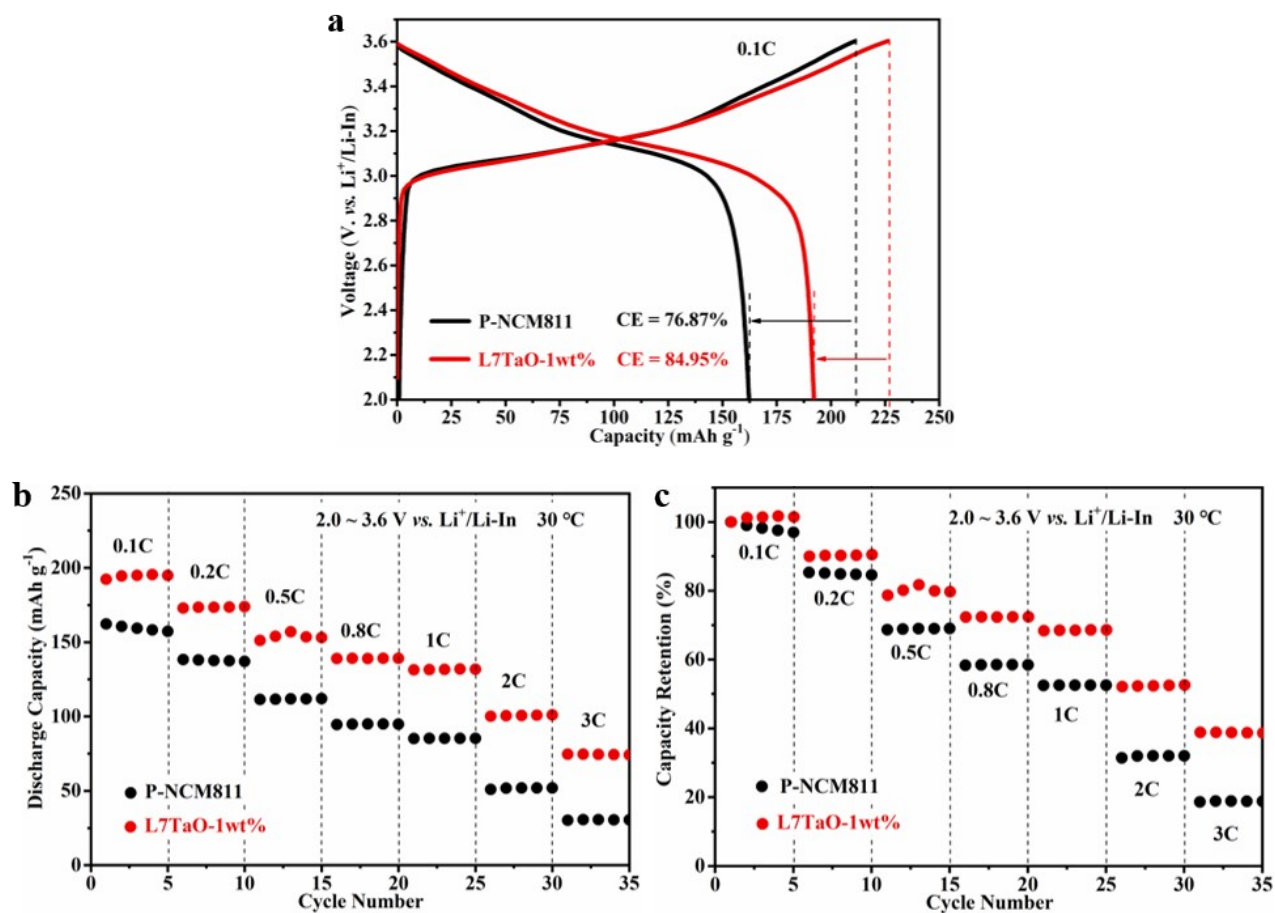

**Fig. S14.** Comparison of the electrochemical performance of P-NCM811 and L7TaO-1 wt% in ASSLBs at 2.0-3.6 V (vs. Li<sup>+</sup>/Li-In) (30 °C). (a) The first charge-discharge profiles of the ASSLBs at 0.1C, and the initial Coulombic Efficiencies (CE). (b) Specific discharge capacities at different C-rates versus the cycle number (1C = 170 mA g<sup>-1</sup>). (c) Capacity retentions curves at different C-rates.

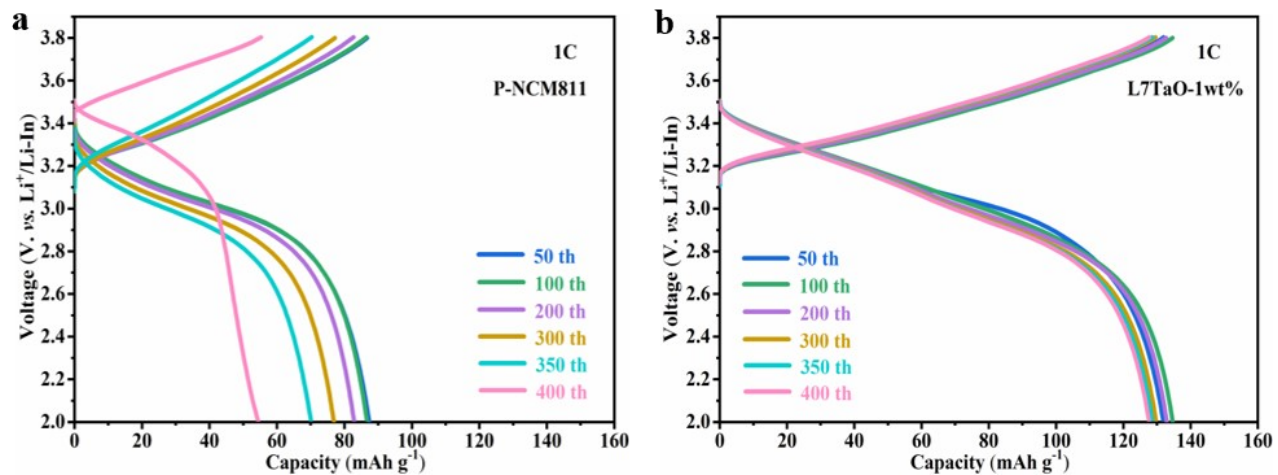

**Fig. S15.** Charge-discharge curves of (a) P-NCM811 and (b) L7TaO-1 wt% at 1 C in selected cycles, which clearly show the polarization trends.

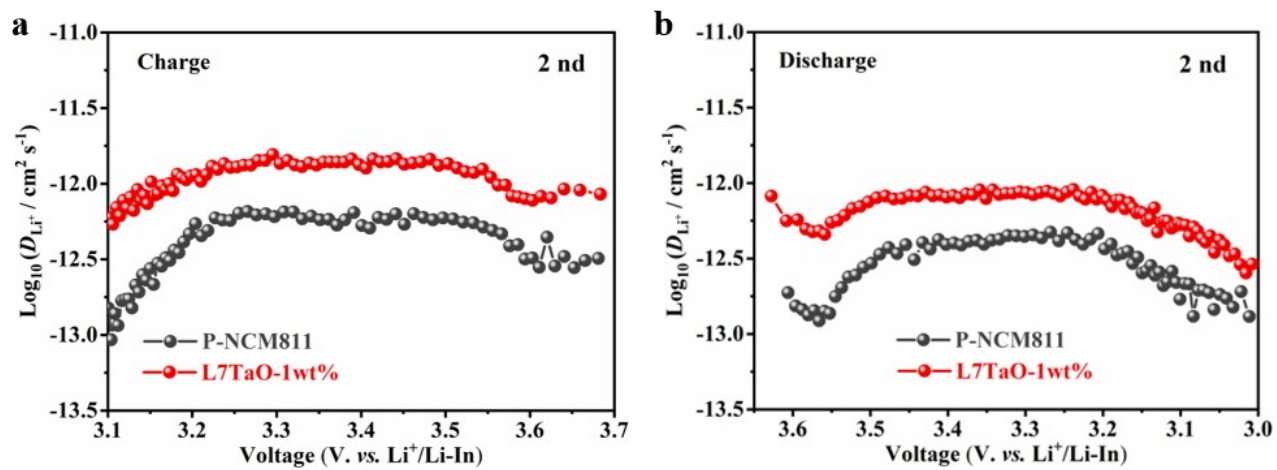

**Fig. S16.** Diffusion coefficients of  $\text{Li}^+$  ions calculated from the GITT curves as a function of voltage during the 2 nd (a) charge and (b) discharge process.

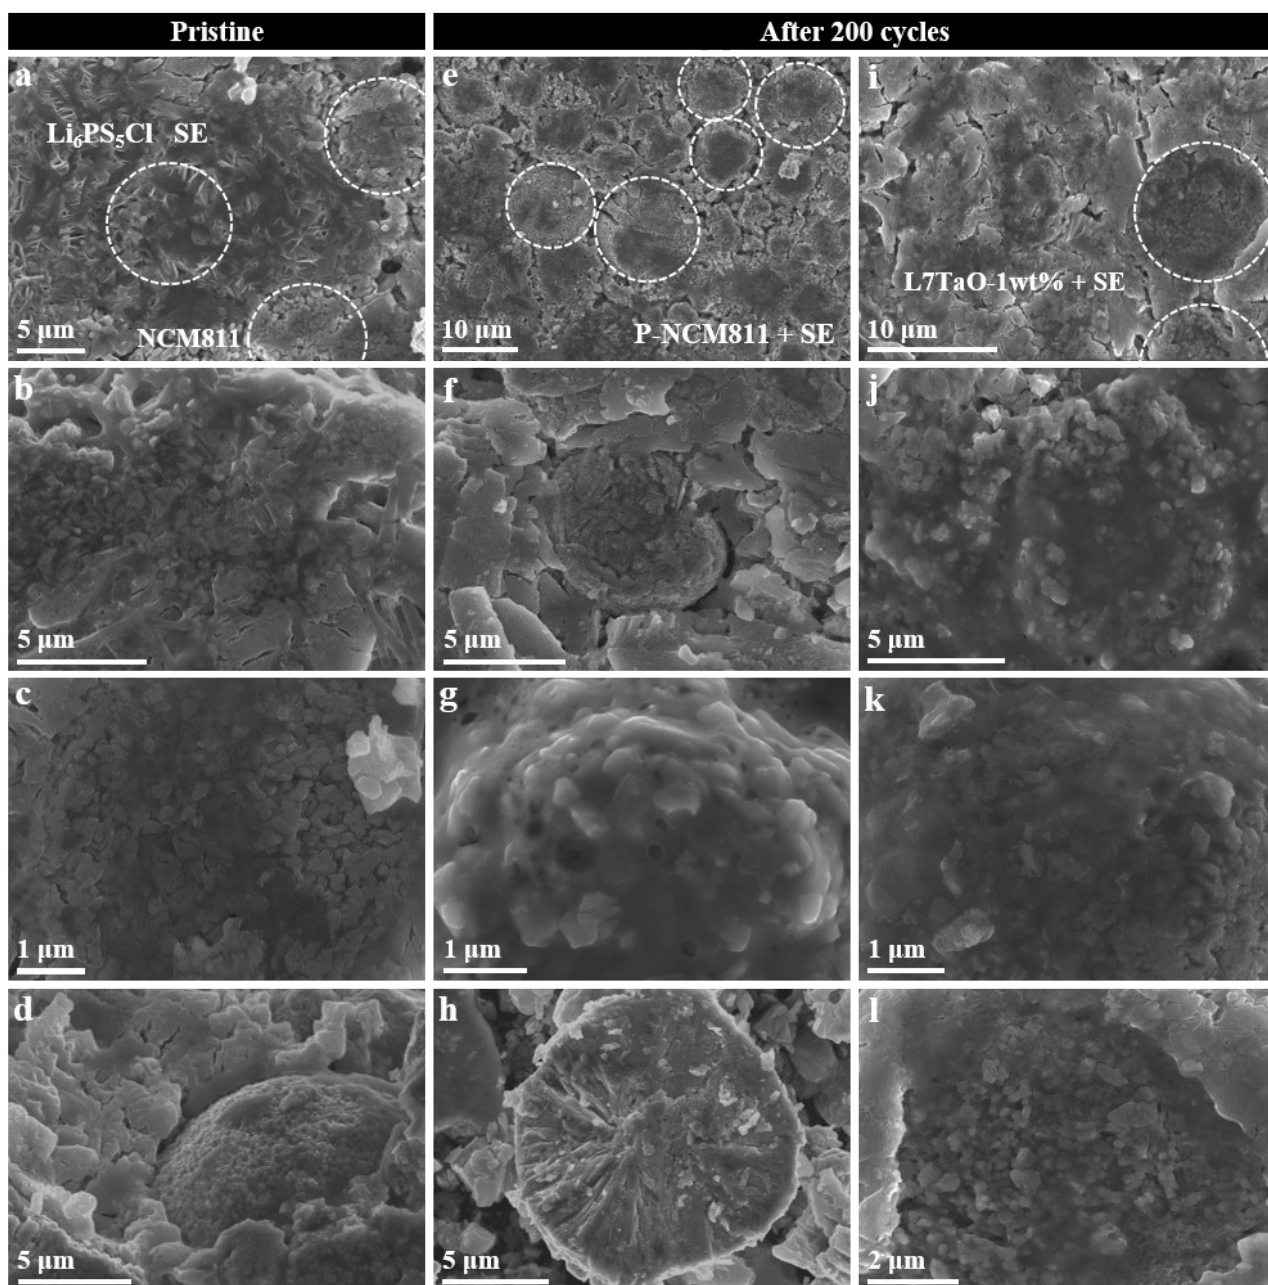

**Fig. S17.** SEM images at different magnifications of the cathode (a–d) in the pristine state and (e–l) after 200 cycles at 1C rate and 30 °C: (e–h) P-NCM811 and (i–l) L7TaO-1 wt%.

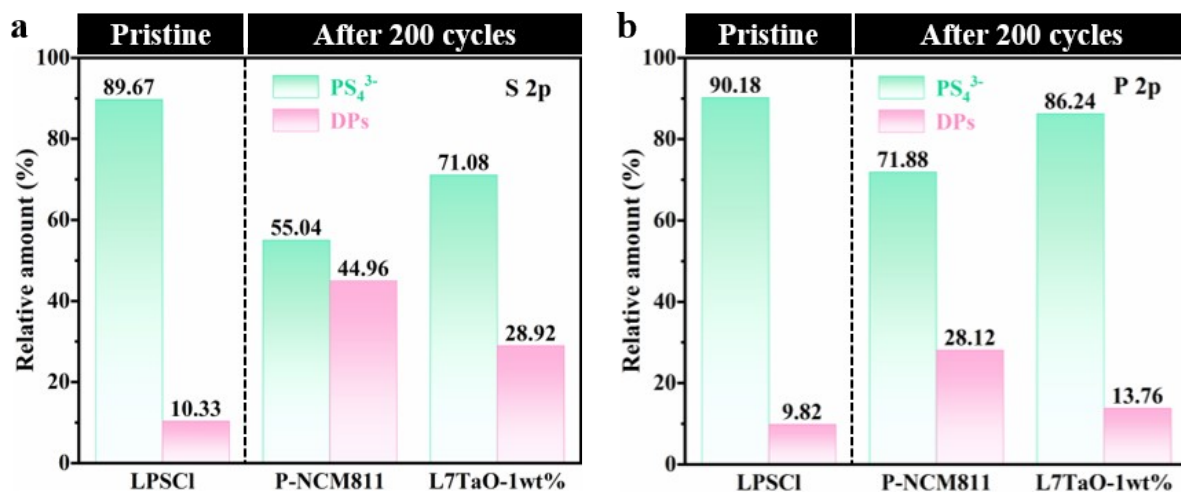

**Fig. S18.** Comparison of relative amounts of the S 2p/P 2p components for the cathodes after 200 cycles at 1C rate and 30 °C (see corresponding spectra in Fig. 7d, g) together with the pristine LPSi as a reference.

**Table S1.** XRD Rietveld refinement results of P-NCM811 and L7TaO-Q wt% (Q = 0.5, 1, 2 and 15) materials.

| Material      | Lattice parameter |               |                 | $c/a$   | $R_p$<br>(%) | $R_{wp}$<br>(%) | Ni <sup>2+</sup> in Li <sup>+</sup><br>layer (%) | $I_{(003)}/I_{(104)}$ |
|---------------|-------------------|---------------|-----------------|---------|--------------|-----------------|--------------------------------------------------|-----------------------|
|               | $a[\text{Å}]$     | $c[\text{Å}]$ | $V[\text{Å}^3]$ |         |              |                 |                                                  |                       |
| P-NCM811      | 2.87121           | 14.20076      | 101.385         | 4.94591 | 1.91         | 2.48            | 7.14                                             | 2.08318               |
| L7TaO-0.5 wt% | 2.86955           | 14.20179      | 101.275         | 4.94913 | 1.97         | 2.54            | 5.76                                             | 1.96489               |
| L7TaO-1 wt%   | 2.86946           | 14.20385      | 101.283         | 4.95001 | 2.09         | 2.73            | 3.86                                             | 2.18367               |
| L7TaO-2 wt%   | 2.86897           | 14.20432      | 101.252         | 4.95102 | 2.08         | 2.68            | 3.69                                             | 2.15563               |
| L7TaO-15 wt%  | 2.86534           | 14.20569      | 100.934         | 4.95784 | 3.61         | 5.79            | 3.19                                             | 2.21828               |



**Table S2.** Simulated results for the Nyquist plots.

| <b>Cathode</b> | <b><math>R_s</math> (<math>\Omega</math>)</b> |              | <b><math>R_e</math> (<math>\Omega</math>)</b> |              | <b><math>R_{ct}</math> (<math>\Omega</math>)</b> |              |
|----------------|-----------------------------------------------|--------------|-----------------------------------------------|--------------|--------------------------------------------------|--------------|
|                | <b>Before</b>                                 | <b>After</b> | <b>Before</b>                                 | <b>After</b> | <b>Before</b>                                    | <b>After</b> |
| P-NCM811       | 29.52                                         | 33.98        | 1.12                                          | 1.26         | 28.10                                            | 53.01        |
| L7TaO-1 wt%    | 28.07                                         | 28.71        | 1.00                                          | 1.56         | 19.47                                            | 25.47        |

**Table S3.** Li<sup>+</sup> diffusion coefficient  $D_{\text{Li}^+}$  of P-NCM811 and L7TaO-1 wt% in the charge and discharge regions.

| <b>Cathode</b> | <b><math>D_{\text{Li}^+}</math> in the charge region/ <math>\text{cm}^2 \text{s}^{-1}</math></b> |                        | <b><math>D_{\text{Li}^+}</math> in the discharge region/ <math>\text{cm}^2 \text{s}^{-1}</math></b> |                        |
|----------------|--------------------------------------------------------------------------------------------------|------------------------|-----------------------------------------------------------------------------------------------------|------------------------|
|                | <b>1 st</b>                                                                                      | <b>2 nd</b>            | <b>1 st</b>                                                                                         | <b>2 nd</b>            |
| P-NCM811       | $7.29 \times 10^{-13}$                                                                           | $4.25 \times 10^{-13}$ | $4.19 \times 10^{-13}$                                                                              | $3.34 \times 10^{-13}$ |
| L7TaO-1 wt%    | $1.28 \times 10^{-12}$                                                                           | $1.09 \times 10^{-12}$ | $9.76 \times 10^{-13}$                                                                              | $6.92 \times 10^{-13}$ |

**Table S4.** Summary comparison of electrochemical properties of our work with reported Ni-rich oxide cathodes in sulfide ASSLBs.

| Ref.     | Cathode                                                                         | Coating                                | Sulfide solid electrolyte                             | Temperature & Voltage                          | Active material loading mass (mg cm <sup>-2</sup> ) | Initial discharge capacity (mAh g <sup>-1</sup> ) & Coulombic efficiency | Cycle stability                                                                                                                                                                                                                                                                                                                                                                                                                                      | Areal capacity (mAh cm <sup>-2</sup> ) |
|----------|---------------------------------------------------------------------------------|----------------------------------------|-------------------------------------------------------|------------------------------------------------|-----------------------------------------------------|--------------------------------------------------------------------------|------------------------------------------------------------------------------------------------------------------------------------------------------------------------------------------------------------------------------------------------------------------------------------------------------------------------------------------------------------------------------------------------------------------------------------------------------|----------------------------------------|
| Our work | LiNi <sub>0.8</sub> Co <sub>0.1</sub> Mn <sub>0.1</sub> O <sub>2</sub> (NCM811) | Li <sub>7</sub> TaO <sub>6</sub>       | Li <sub>6</sub> PS <sub>5</sub> Cl                    | 30°C & 2.0-3.8 (V vs. Li <sup>+</sup> /Li-In)  | 8.92                                                | 203 (0.1C) & 85.4%                                                       | 134.7 mAh g <sup>-1</sup> & 102.6% (1C, 100 cycles);<br>123.9 mAh g <sup>-1</sup> & 94.4% (1C, 500 cycles);<br>114.3 mAh g <sup>-1</sup> & 87.1% (1C, 1000 cycles);<br>94.5 mAh g <sup>-1</sup> & 72% (1C, 2000 cycles);<br>85.8 mAh g <sup>-1</sup> & 65.4% (1C, 3000 cycles);<br>85.1 mAh g <sup>-1</sup> & 64.8% (1C, 4000 cycles);<br>84.3 mAh g <sup>-1</sup> & 64.2% (1C, 5000 cycles);<br>80.2 mAh g <sup>-1</sup> & 61.1% (1C, 5650 cycles). | 1.52 (1C)                              |
| [1]      | NCM811                                                                          | LiNbO <sub>3</sub>                     | Li <sub>6</sub> PS <sub>5</sub> Cl                    | 30°C & 2.5-4.0 (V vs. Li <sup>+</sup> /Li)     | 4.00                                                | 111.7 (0.05C) & 66.8%                                                    | 100.2 mAh g <sup>-1</sup> & 89.7% (0.05C, 100 cycles)                                                                                                                                                                                                                                                                                                                                                                                                | 0.80 (1C)                              |
| [2]      | NCM811                                                                          | LiOH                                   | Li <sub>6</sub> PS <sub>5</sub> Cl                    | 25°C & 2.5-4.2 (V vs. Li <sup>+</sup> /Li-In)  | 5.53                                                | 158.9 (0.1C) & ~ 64%                                                     | ~ 130 mAh g <sup>-1</sup> & 90% (0.1C, 600 cycles)                                                                                                                                                                                                                                                                                                                                                                                                   | 1.10 (1C)                              |
| [3]      | NCM811                                                                          | No coating (clean surface)             | Li <sub>5.5</sub> PS <sub>4.5</sub> Cl <sub>1.5</sub> | 25°C & 2.1-3.8 (V vs. Li <sup>+</sup> /Li-In)  | 8.92                                                | 156.8 (0.05C) & 76%                                                      | 108.6 mAh g <sup>-1</sup> & 87.7% (0.2C, 200 cycles)                                                                                                                                                                                                                                                                                                                                                                                                 | n.a.                                   |
| [4]      | NCM811                                                                          | LiCoO <sub>2</sub> -LiNbO <sub>3</sub> | Li <sub>10</sub> GeP <sub>2</sub> S <sub>12</sub>     | 35°C & 2.1-3.78 (V vs. Li <sup>+</sup> /Li-In) | 10.23                                               | 182.4 (0.1C) & n.a.                                                      | ~ 128 mAh g <sup>-1</sup> & 80% (0.3C, 585 cycles)                                                                                                                                                                                                                                                                                                                                                                                                   | 2.05 (1C)                              |

|      |                                                                                                                 |                                                        |                                                                                               |                                                   |       |                          |                                                                                                |           |
|------|-----------------------------------------------------------------------------------------------------------------|--------------------------------------------------------|-----------------------------------------------------------------------------------------------|---------------------------------------------------|-------|--------------------------|------------------------------------------------------------------------------------------------|-----------|
| [5]  | NCM811                                                                                                          | LiNbO <sub>3</sub>                                     | Li <sub>10</sub> GeP <sub>2</sub> S <sub>12</sub>                                             | 35°C & 2.1-3.78<br>(V vs. Li <sup>+</sup> /Li-In) | 10.23 | 162 (0.1C) & 85.9%       | ~ 105 mAh g <sup>-1</sup> & 77.9% (0.5C, 50 cycles)                                            | 2.05 (1C) |
| [6]  | NCM811                                                                                                          | Li <sub>3</sub> PO <sub>4</sub>                        | Li <sub>10</sub> GeP <sub>2</sub> S <sub>12</sub>                                             | 25°C & 2.1-3.9<br>(V vs. Li <sup>+</sup> /Li-In)  | 8.92  | 170.6 (0.1C) & 75.1%     | 96.1 mAh g <sup>-1</sup> & 58.9% (0.2C, 300 cycles)                                            | n.a.      |
| [7]  | LiNi <sub>0.88</sub> Co <sub>0.09</sub> Mn <sub>0.03</sub><br>O <sub>2</sub>                                    | N <sub>2</sub> /CS <sub>2</sub><br>sulfide layer       | Li <sub>6</sub> PS <sub>5</sub> Cl                                                            | 33°C & 1.5-2.8<br>(V vs. Li <sup>+</sup> /LTO)    | 1.27  | 200.7 (0.1C) & 77.7%     | 131.2 mAh g <sup>-1</sup> & 87% (1C, 500 cycles)                                               | 0.25 (1C) |
| [8]  | LiNi <sub>0.85</sub> Co <sub>0.10</sub> Mn <sub>0.05</sub><br>O <sub>2</sub>                                    | ZrO <sub>2</sub>                                       | Li <sub>6</sub> PS <sub>5</sub> Cl                                                            | 45°C & 1.35-2.75<br>(V vs. Li <sup>+</sup> /LTO)  | 11.30 | 204 (0.1C) & 89%         | 156 mAh g <sup>-1</sup> & 83% (0.2C, 160 cycles)                                               | 2.15 (1C) |
| [9]  | LiNi <sub>0.85</sub> Co <sub>0.10</sub> Mn <sub>0.05</sub><br>O <sub>2</sub>                                    | HfO <sub>2</sub>                                       | Li <sub>6</sub> PS <sub>5</sub> Cl                                                            | 45°C & 1.4-2.8<br>(V vs. Li <sup>+</sup> /LTO)    | 10.55 | 200 (0.1C) & 87.8%       | 139.4 mAh g <sup>-1</sup> & 82% (0.5C, 70 cycles)                                              | 2.00 (1C) |
| [10] | LiNi <sub>0.82</sub> Co <sub>0.12</sub> Mn <sub>0.06</sub><br>O <sub>2</sub>                                    | LiTaO <sub>3</sub>                                     | Li <sub>6</sub> PS <sub>5</sub> Cl                                                            | 30°C & 1.9-3.7<br>(V vs. Li <sup>+</sup> /Li-In)  | 5.97  | 202.1 (0.05C) &<br>72.4% | ~ 167.7 mAh g <sup>-1</sup> & 83% (0.2C, 30 cycles)<br>(1.9-3.9 V vs. Li <sup>+</sup> /Li-In)) | 1.01 (1C) |
| [11] | Li(Ni <sub>0.9</sub> Co <sub>0.05</sub> Mn <sub>0.05</sub> )<br><sub>0.8</sub> Co <sub>0.2</sub> O <sub>2</sub> | Al <sub>2</sub> O <sub>3</sub> -LiAlO <sub>2</sub>     | Li <sub>9.54</sub> Si <sub>1.7</sub> P <sub>1.44</sub><br>S <sub>11.7</sub> Cl <sub>0.3</sub> | 45°C & 2.1-3.68<br>(V vs. Li <sup>+</sup> /Li-In) | 36.94 | 158.6 (0.2C) & 88.3%     | 136.75 mAh g <sup>-1</sup> & 96.3% (1C, 500 cycles)                                            | 7.39 (1C) |
| [12] | LiNi <sub>0.70</sub> Co <sub>0.15</sub> Mn <sub>0.15</sub><br>O <sub>2</sub> (NCM701515)                        | Al <sub>2</sub> O <sub>3</sub> -LiAlO <sub>2</sub>     | Li <sub>6</sub> PS <sub>5</sub> Cl                                                            | 25°C & 2.0-3.7<br>(V vs. Li <sup>+</sup> /Li-In)  | 10.39 | 154 (0.1C) & 70.4%       | 75 mAh g <sup>-1</sup> & 54% (0.25C, 100 cycles)                                               | 2.08 (1C) |
| [13] | NCM701515                                                                                                       | Li <sub>4</sub> Ti <sub>5</sub> O <sub>12</sub>        | Li <sub>6</sub> PS <sub>5</sub> Cl                                                            | 25°C & 2.0-3.7<br>(V vs. Li <sup>+</sup> /Li-In)  | 10.39 | 135 (0.1C) & 70.4%       | 64.8 mAh g <sup>-1</sup> & 48% (0.25C, 100 cycles)                                             | 2.08 (1C) |
| [14] | LiNi <sub>0.6</sub> Co <sub>0.2</sub> Mn <sub>0.2</sub> O <sub>2</sub><br>(NCM622)                              | Li <sub>2</sub> CO <sub>3</sub> -LiNbO <sub>3</sub>    | Li <sub>6</sub> PS <sub>5</sub> Cl                                                            | 45°C & 1.35-2.85<br>(V vs. Li <sup>+</sup> /LTO)  | 8.92  | 180 (0.2C) & 90%         | 82 mAh g <sup>-1</sup> & 45.5% (0.2C, 200 cycles)                                              | 1.61 (1C) |
| [15] | NCM622                                                                                                          | Li <sub>0.35</sub> La <sub>0.55</sub> TiO <sub>3</sub> | Li <sub>6</sub> PS <sub>5</sub> Cl                                                            | 25°C & 2.2-3.7<br>(V vs. Li <sup>+</sup> /Li-In)  | 6.40  | 179.9 (0.05C) &<br>78.1% | 152.1 mAh g <sup>-1</sup> & 84.5% (0.1C, 100 cycles)                                           | 1.28 (1C) |

|      |        |                                                                       |                                                                                |                                                    |       |                          |                                                      |           |
|------|--------|-----------------------------------------------------------------------|--------------------------------------------------------------------------------|----------------------------------------------------|-------|--------------------------|------------------------------------------------------|-----------|
| [16] | NCM622 | $\text{LiZr}_2(\text{PO}_4)_3$                                        | $\text{Li}_6\text{PS}_5\text{Cl}$                                              | 30°C & 2.0-3.7<br>(V vs. Li <sup>+</sup> /Li-In)   | 8.92  | 145.6 (0.1C) &<br>79.4%. | 117.4 mAh g <sup>-1</sup> & 86.2% (0.2C, 100 cycles) | n.a.      |
| [17] | NCM622 | $\text{TiNb}_2\text{O}_7$                                             | $\text{Li}_{10}\text{GeP}_2\text{S}_{12}$                                      | 30°C & 2.1-3.8<br>(V vs. Li <sup>+</sup> /Li-In)   | 9.91  | 180.3 (0.05C) &<br>86.3% | ~ 145 mAh g <sup>-1</sup> & 92.2% (0.1C, 140 cycles) | 1.78 (1C) |
| [18] | NCM622 | $\text{Li}_{1.4}\text{Al}_{0.4}\text{Ti}_{1.6}(\text{P}\text{O}_4)_3$ | $\text{Li}_{10}\text{SnP}_2\text{S}_{12}$                                      | 25°C & 2.2-3.7<br>(V vs. Li <sup>+</sup> /Li-In)   | 7.13  | 152.1 (0.05C) &<br>86.4% | 147.8 mAh g <sup>-1</sup> & 87.6% (0.1C, 100 cycles) | n.a.      |
| [19] | NCM622 | $\text{LiNbO}_3$                                                      | $\text{Li}_{9.54}\text{Si}_{1.7}\text{P}_{1.44}\text{S}_{11.7}\text{Cl}_{0.3}$ | 40°C & 2.1-3.68<br>(V vs. Li <sup>+</sup> /Li-In)  | 10.23 | 175.7 (0.1C) &<br>88.7%. | 147 mAh g <sup>-1</sup> & 91.3% (0.5C, 100 cycles)   | 2.05 (1C) |
| [20] | NCM622 | $\text{LiNbO}_3\text{-Li}_2\text{CO}_3$                               | $\beta\text{-Li}_3\text{PS}_4$                                                 | 25°C & 1.35-2.85<br>(V vs. Li <sup>+</sup> /LTO)   | 8.92  | 136 (0.1C) & 87%         | ~ 125 mAh g <sup>-1</sup> & 91% (0.1C, 100 cycles)   | 1.61 (1C) |
| [21] | NCM622 | $\text{Li}_2\text{CuO}_2\text{-CuO}$                                  | $\text{Li}_7\text{P}_2\text{S}_8\text{I}$                                      | 25°C & 2.38-3.68<br>(V vs. Li <sup>+</sup> /Li-In) | n.a.  | 123 (0.05C) & n.a.       | 105. mAh g <sup>-1</sup> & 86% (0.05C, 20 cycles)    | n.a       |
| [22] | NCM622 | $\text{LiNbO}_3$                                                      | $\text{Li}_7\text{P}_2\text{S}_8\text{I}$                                      | 25°C & 2.38-3.68<br>(V vs. Li <sup>+</sup> /Li-In) | n.a.  | 135.1 (0.1C) & n.a.      | ~120 mAh g <sup>-1</sup> & 84.4% (0.1C, 20 cycles)   | n.a       |

## References

- [1] J. Zhang, H. Zhong, C. Zheng, Y. Xia, C. Liang, H. Huang, Y. Gan, X. Tao and W. Zhang, *J. Power Sources*, 2018, **391**, 73.
- [2] Y. Zhang, X. Sun, D. Cao, G. Gao, Z. Yang, H. Zhu and Y. Wang, *Energy Storage Mater.*, 2021, **41**, 505.
- [3] S. Deng, Q. Sun, M. Li, K. Adair, C. Yu, J. Li, W. Li, J. Fu, X. Li, R. Li, Y. Hu, N. Chen, H. Huang, L. Zhang, S. Zhao, S. Lu and X. Sun, *Energy Storage Mater.*, 2021, **35**, 661.
- [4] X. Li, Q. Sun, Z. Wang, D. Song and L. Zhu, *J. Power Sources*, 2020, **456**, 227997.
- [5] X. Li, L. Jin, D. Song, H. Zhang, X. Shi, Z. Wang, L. Zhang and L. Zhu, *J. Energy Chem.*, 2020, **40**, 39.
- [6] S. Deng, X. Li, Z. Ren, W. Li, J. Luo, J. Liang, J. Liang, M. N. Banis, M. Li, Y. Zhao, X. Li, C. Wang, Y. Sun, Q. Sun, R. Li, Y. Hu, H. Huang, L. Zhang, S. Lu, J. Luo and X. Sun, *Energy Storage Mater.*, 2020, **27**, 117.
- [7] Y. Wang, Z. Wang, D. Wu, Q. Niu, P. Lu, T. Ma, Y. Su, L. Chen, H. Li and F. Wu, *eScience*, 2022.
- [8] Y. Ma, J. H. Teo, F. Walther, Y. Ma, R. Zhang, A. Mazilkin, Y. Tang, D. Goonetilleke, J. Janek, M. Bianchini and T. Brezesinski, *Adv. Funct. Mater.*, 2022, **32**, 2111829.
- [9] D. Kitsche, Y. Tang, Y. Ma, D. Goonetilleke, J. Sann, F. Walther, M. Bianchini, J. Janek and T. Brezesinski, *ACS Applied Energy Materials*, 2021, **4**, 7338.
- [10] J. S. Lee and Y. J. Park, *ACS Appl. Mater. Interfaces*, 2021, **13**, 38333.
- [11] X. Li, Y. Sun, Z. Wang, X. Wang, H. Zhang, D. Song, L. Zhang and L. Zhu, *Electrochim. Acta*, 2021, **391**, 138917.
- [12] R. S. Negi, Y. Yusim, R. Pan, S. Ahmed, K. Volz, R. Takata, F. Schmidt, A. Henss and M. T. Elm, *Adv. Mater. Interfaces*. 2022, **9**, 2101428.
- [13] R. S. Negi, P. Minnmann, R. Pan, S. Ahmed, M. J. Herzog, K. Volz, R. Takata, F. Schmidt, J.



- Janek and M. T. Elm, *Chem. Mater.*, 2021, **33**, 6713.
- [14]F. Walther, F. Strauss, X. Wu, B. Mogwitz, J. Hertle, J. Sann, M. Rohnke, T. Brezesinski and J. Janek, *Chem. Mater.*, 2021, **33**, 2110.
- [15]Z. Fan, J. Xiang, Q. Yu, X. Wu, M. Li, X. Wang, X. Xia and J. Tu, *ACS Appl. Mater. Interfaces*, 2022, **14**, 726.
- [16]X. Sun, L. Wang, J. Ma, X. Yu, S. Zhang, X. Zhou and G. Cui, *ACS Appl. Mater. Interfaces*, 2022, **14**, 17674.
- [17]N. Sun, Y. Song, Q. Liu, W. Zhao, F. Zhang, L. Ren, M. Chen, Z. Zhou, Z. Xu, S. Lou, F. Kong, J. Wang, Y. Tong and J. Wang, *Adv. Energy Mater.*, 2022, 2200682.
- [18]X. Li, Z. Jiang, D. Cai, X. Wang, X. Xia, C. Gu and J. Tu, *Small*, 2021, **17**, 2103830.
- [19]X. Li, W. Peng, R. Tian, D. Song, Z. Wang, H. Zhang, L. Zhu and L. Zhang, *Electrochim. Acta*, 2020, **363**, 137185.
- [20]A. Y. Kim, F. Strauss, T. Bartsch, J. H. Teo, T. Hatsukade, A. Mazilkin, J. Janek, P. Hartmann and T. Brezesinski, *Chem. Mater.*, 2019, **31**, 9664.
- [21]S. Jung, R. Rajagopal and K. Ryu, *Mater. Chem. Phys.*, 2021, **270**, 124808.
- [22]Y. Kim, R. Rajagopal, S. Kang and K. Ryu, *Chem. Eng. J.*, 2020, **386**, 123975.
